# Supplementary material
Source: publisher figshare collection journal article supplement (https://sage.figshare.com/ndownloader/files/13078364)
Supplement: Supplementary file 1 [file 13078364]

## Lab Implementation Appendix

*Individual Lab descriptions organized alphabetically by the last name of the first author of each lab. The analyses for each RRR that include or exclude data from each lab are listed below each lab's description.*

Oguz A. Acar, City, University of London  
Irene Scopelliti, City, University of London

OSF Page: <https://osf.io/sccbg/>

A total of 237 students were recruited from the marketing subject pool at Cass Business School, City, University of London to complete course requirements. Data collection took place across 2 sessions consisting of 108 and 129 participants. After applying the preregistered exclusion criteria, our laboratory contributed usable data from a total of 214 participants for the Srull RRR and 163 for the Mazar RRR. In the first session, participants were tested in a room with 180 seats. For the second session, that room was unavailable and we switched to a room with 214 seats. We used the provided packets except from the minor changes that were made in order to make the protocol more suitable for Britain as approved by the replication team. We also included additional measures at the end of the study. All these differences are specified in our pre-registered plan. In all other respects, we followed the official protocol. Although our pre-registered plan specified that we would have 3 sessions of 100 participants, due to subject pool availability we were only able to schedule 2 sessions. However, in line with the preregistration plan, we obtained more than the minimum sample size required by the replication protocol in these two sessions.

- Included in SW primary analyses
- Excluded from MAA primary analysis for not collecting usable data from a minimum of 200 participants
- Included in MAA ancillary analysis of all labs
- Excluded from MAA ancillary analysis with strict inclusion criteria for not collecting usable data from a minimum of 200 participants

Balazs Aczel, Institute of Psychology, ELTE Eötvös Loránd University, Budapest, Hungary

Bence E. Bakos, Institute of Psychology, ELTE Eötvös Loránd University, Budapest, Hungary

Marton Kovacs, Institute of Psychology, ELTE Eötvös Loránd University, Budapest, Hungary

Peter Szecsi, Institute of Psychology, ELTE Eötvös Loránd University, Budapest, Hungary

OSF Page: <https://osf.io/sym5s/>

A total of 245 students (hostile x commandments x no cheat = 29, hostile x commandments x cheat = 32, hostile x books x no cheat = 30, hostile x books x cheat = 32, neutral x books x cheat = 27, neutral x books x no cheat = 28, neutral x commandments x cheat = 35, neutral x commandments x no cheat = 32) were recruited from the participant pool of Eötvös Loránd University and received course credits for their participation. In each experimental session, the number of participants exceeded the minimum 50, but did not reach the ideal 100 participants. The materials were translated into Hungarian using the same process as described in the official protocol. The date of the experimental session was not recorded for several participants. The experimenters were blind to what conditions the participants were assigned to, however, they knew that there were different conditions. In all other aspects, the official protocol was followed. After applying the preregistered exclusion criteria, our laboratory contributed usable data from a total of 225 participants for the SW-RRR, and 215 participants for the MAA-RRR.

- Included in SW primary analyses
- Included in MAA primary analysis
- Included in MAA ancillary analysis of all labs
- Included in MAA ancillary analysis with strict inclusion criteria

Ernest Baskin, Haub School of Business, Saint Joseph's University

Sean P. Coary, Haub School of Business, Saint Joseph's University

OSF Page: <https://osf.io/faw22/>

A total of 207 students were recruited from the psychology subject pool at Saint Joseph's University and received course credit for participating. Data collection took place across 3 sessions. Participants were tested in a room with 250 seats. In all respects, we followed the official protocol. After applying the preregistered exclusion criteria, our laboratory contributed usable data from a total of 198 participants for the SW-RRR, and 173 participants for the MAA-RRR.

- Excluded from SW primary analyses for not collecting usable data from a minimum of 200 participants, but included in SW ancillary analyses
- Excluded from MAA primary analysis for not collecting usable data from a minimum of 200 participants
- Included in MAA ancillary analysis of all labs
- Excluded from MAA ancillary analysis with strict inclusion criteria for not collecting usable data from a minimum of 200 participants

Angie R. Birt, Mount Saint Vincent University

OSF Page: <https://osf.io/a76u9/>

A total of 234 students were recruited from undergraduate courses across disciplines at Mount Saint Vincent University and received course credit for participating. Data collection took place across 4 sessions consisting of 85, 84, 57, and 8 participants. Participants were tested in one of two rooms, one with 200 seats and the other with 110 seats. We used the provided packets and followed the official protocol. After the preregistered exclusion criteria were applied, our laboratory contributed usable data from a total of 205 participants for the SW-RRR and 205 for the MAA-RRR. Although the protocol required a minimum of 20% men and 20% women, limitations of our subject pool meant that our final sample included only 18% men.

- Included in SW primary analyses
- Included in MAA primary analysis (data-blind approval for collecting sample that was not between 20% and 80% female)
- Included in MAA ancillary analysis of all labs
- Excluded from MAA ancillary analysis with strict inclusion criteria for collecting sample that was not between 20% and 80% female

Lisa Blatz, University of Cologne

Jan Crusius, University of Cologne

OSF Page: <https://osf.io/6hd7x/>

A total of 320 students were recruited from an introductory social psychology lecture at the University of Cologne and received a chocolate bar for participating. Data collection took place across one session. After applying the preregistered exclusion criteria, our laboratory contributed usable data from a total of 212 participants for the SW-RRR, and 196 participants for the MAA-RRR. Participants were tested in a room with 616 seats. We used the provided packets after translating the contents into German in collaboration with the other German teams. Although the protocol required a minimum of 20% men and 20% women, limitations of our subject pool meant that our final sample was only 12% men. In all other respects, we followed the official protocol. Because of privacy concerns we had to remove or replace some demographic information. If participants were older than 25 years, we replaced their age with the median age of that sub-sample. If participants were identifiable by their major alone, we replaced this information by "removedForPrivacy". If participants were identifiable by the combination of their age and gender, we replaced the age by the median age of the sample.

- Included in SW primary analyses
- Excluded from MAA primary analysis for not collecting usable data from a minimum of 200 participants
- Included in MAA ancillary analysis of all labs
- Excluded from MAA ancillary analysis with strict inclusion criteria for not collecting usable data from a minimum of 200 participants and for collecting sample that was not between 20% and 80% female

Jacqueline R. Evans, Florida International University

Keith Wylie, Florida International University

Steve D. Charman, Florida International University

OSF Page: <https://osf.io/3f83k/>

A total of 332 students were recruited from the psychology subject pool at Florida International University and received extra credit in their courses for participating. Data collection took place across four sessions consisting of 130, 83, 80, and 39 participants. Enrollment in the final session was 61 students, but only 39 students attended during the administration. These participants are marked as “session too small” in the dataset. After applying the preregistered exclusion criteria, our laboratory contributed usable data from a total of 243 participants for the SW-RRR, and 231 participants for the MAA-RRR.

We used the provided packets in English. As noted in the preregistration template submitted by our lab, in classes that were long enough (i.e., 75 minutes, as opposed to 50 minutes), participants completed a second, unrelated study after finishing the replication. This occurred in two of the four classes. The study was included in the packet after all the replication materials. Participants who asked what to do with the sheet torn out of the packet were instructed not to turn it in. Participants were offered extra credit for the class in which they participated. The data were entered and coded according to the instructions provided by the editors.

- Included in SW primary analyses
- Included in MAA primary analysis
- Included in MAA ancillary analysis of all labs
- Included in MAA ancillary analysis with strict inclusion criteria

Fernando Ferreira-Santos, University of Porto

Fernando Barbosa, University of Porto

Rita Pasion, University of Porto

OSF Page: <https://osf.io/ee9sc/>

A total of 291 students were recruited from the student body of the University of Porto (Portugal) and received fee waivers for extra-curricular workshops/seminars organized by our laboratory. Data collection took place across five sessions consisting of 52, 58, 63, 60, and 58 participants. After applying the preregistered exclusion criteria, our laboratory contributed usable data from a total of 234 participants for the Snull RRR and 211 for the Mazar RRR. Participants were tested in a room with 236 seats. We used the provided packets after translating the contents into Portuguese. In all other respects, we followed the official protocol. We thank Rita Almeida and Helena Martins for their help with data coding.

- Included in SW primary analyses
- Included in MAA primary analysis
- Included in MAA ancillary analysis of all labs

- Included in MAA ancillary analysis with strict inclusion criteria

Marta González-Iraizoz, University of Warwick

Andrea Isoni, University of Warwick

Elliot A. Ludvig, University of Warwick

OSF Page: <https://osf.io/z2wyh/>

A total of 235 students were recruited from the psychology subject pool at the University of Warwick (UK) and received course credit for participating. Data collection took place across 2 sessions consisting of 111 and 124 participants respectively. After applying the preregistered exclusion criteria, our laboratory contributed usable data from a total of 229 participants to the Srull and Wyer RRR and 214 to the Mazar et al. RRR.

Participants were tested in a room with 165 seats. We used the provided packets after minor edits to adapt the original versions to British English. At the beginning, participants were given oral instructions on the organization of the session. In all other respects, we followed the official protocol. Although the protocol required a minimum of 20% men and 20% women, limitations of our subject pool meant that our final sample was only 17% men. All three authors participated in adapting the RRR protocols ahead of preregistration, and contributed to the data collection. Marta González-Iraizoz entered the data into the spreadsheets and coded all the results. We thank Danae Arroyos-Calvera, Caspar von Schenck, Merle van den Akker, Neo Poon, Alina Gutoreva, Jianqiao Zhu, Dinis Gokaydin, Evan Fradkin and Tom Kelly for help with running the experimental sessions.

- Included in SW primary analyses
- Included in MAA primary analysis (data-blind approval for collecting sample that was not between 20% and 80% female)
- Included in MAA ancillary analysis of all labs
- Excluded from MAA ancillary analysis with strict inclusion criteria for collecting sample that was not between 20% and 80% female

Felix Holzmeister, University of Innsbruck

Juergen Huber, University of Innsbruck

Michael Kirchler, University of Innsbruck

OSF Page: <https://osf.io/6ujcp/>

A total of 274 students were recruited from the Innsbruck EconLab subject pool and compulsory courses on the Bachelor level at the University of Innsbruck, who received course credits for participating. Data collection took place across four sessions consisting of 72, 59, 82, and 61 participants. After applying the pre-registered exclusion criteria, our laboratory contributed usable data from a total of 246 participants to the Mazar et al. RRR and 253 to the Srull and Wyer RRR. Participants were tested in a room with 160 seats. We used the provided packets after translating the contents into German (jointly with the teams from the University of Cologne, Leuphana University of Lüneburg, Saarland University, the University of Vienna, and the University of

Würzburg). Our pre-registered plan specified that we would test all participants in a single session in two separate rooms. However, with the prior approval of the editor, data was collected in four sessions (conducted between March 15 and March 29, 2017) due to limitations of our subject pool. In all other respects, we followed the official protocol.

- Included in SW primary analyses
- Included in MAA primary analysis
- Included in MAA ancillary analysis of all labs
- Included in MAA ancillary analysis with strict inclusion criteria

Rafaele J. C. Huntjens, University of Groningen

Coby Gerlsma, University of Groningen

OSF Page: <https://osf.io/vxz7q/>

A total of 216 university and college students were recruited from the subject pool at University of Groningen / Hanze hogeschool Groningen, with students in session 3 receiving course credits. Data collection took place across 3 sessions consisting of 50, 61, and 105 participants. After applying the preregistered exclusion criteria, our laboratory contributed usable data from a total of 190 participants for the SW-RRR. Participants were tested in a room with 162 to 312 seats depending on the room. We used the provided packets (in Dutch, n = 7 English). Collection slip changes: the original booklets asked participants to list their name, email and number of completed boxes. During the ethics approval process, we were required to remove the name and email from inside the booklet to ensure no identifiable information remained within the booklet. Consequently, the collection slip in the booklet only asked for the number of boxes. We added a separate page asking for the number of boxes, name, and address for the lottery. In all other respects, we followed the official protocol.

- Excluded from SW primary analyses for having fewer than 200 participants, but included in SW ancillary analyses
- Excluded from MAA primary analysis for not following protocol
- Excluded from MAA ancillary analysis of all labs for not following protocol
- Excluded from MAA ancillary analysis with strict inclusion criteria for not following protocol

Nathalie klein Selle, Hebrew University of Jerusalem

Noa Feldman, Hebrew University of Jerusalem

Gershon Ben-Shakhar, Hebrew University of Jerusalem

Nir Rozmann, Bar-Ilan University

Galit Nahari, Bar-Ilan University

OSF Page: <https://osf.io/a7xbn/>

All the material was translated from English into Hebrew by one of the experimenters, and two other experimenters checked and edited the documents for accuracy. All materials were then back-translated from Hebrew to English by a native Hebrew speaker. Several minor discrepancies between the original versions and the English back-translations were then discussed and solved by all authors. 337 Participants were recruited from the Department of Psychology at the Hebrew University of Jerusalem (HUJI) and from the Department of Criminology at Bar-Ilan University (BIU) by signing up through an online experiment system (Sona Systems). Participants were also recruited by spreading flyers in the Department of Psychology at the HUJI and by publishing the experiment on different Facebook groups. All participants received course credits for their participation. Participants were tested in three groups of approximately 100 students (one group at the HUJI and two groups at BIU). After applying the preregistered exclusion criteria, our laboratory contributed usable data from a total of 299 participants for the SW-RRR, and 283 participants for the MAA-RRR. We were permitted to extend the maximum age to 27, as this age range was thought to better reflect the undergraduate population in Israel, but given we were able to recruit enough participants in the 18-25y age range, we adhered to the age range specified in the protocol (18-25y). In sum, our procedure followed the approved protocol and did not deviate from our preregistered plan. Finally, several of our participants confused the Hebrew word for paperclip with stapler and, hence, thought of alternative uses for a stapler (these cases are documented in the notes column of our data template).

- Included in SW primary analyses
- Included in MAA primary analysis
- Included in MAA ancillary analysis of all labs
- Included in MAA ancillary analysis with strict inclusion criteria

Lina Koppel, Linköping University

Gustav Tinghög, Linköping University

Daniel Västfjäll, Linköping University and Decision Research, Eugene, OR

OSF Page: <https://osf.io/a58b4/>

A total of 263 students were recruited from the subject pool at Linköping University and received a movie voucher for participating. Data collection took place across three sessions consisting of 74, 81, and 108 participants. After applying the preregistered exclusion criteria, our laboratory contributed usable data from a total of 242 participants for the Srull & Wyer study and 236 participants for the Mazar et al. study. Participants were tested in a room with 270 seats. We used the provided packets after translating the contents into Swedish. In all other respects, we followed the official protocol.

- Included in SW primary analyses
- Included in MAA primary analysis
- Included in MAA ancillary analysis of all labs
- Included in MAA ancillary analysis with strict inclusion criteria

Tei Laine, Université Grenoble Alpes  
Kévin Vezirian, Université Grenoble Alpes  
Laurent Bègue, Université Grenoble Alpes  
OSF Page: <https://osf.io/n4zxb/>

A total of 313 students attending the course in social psychology (2nd year) at Université Grenoble Alpes participated in the experiment during their regular class time. They did not receive any course credit for participating. Data collection took place across 3 sessions. Participants were tested in a room with 300-400 seats. After applying the preregistered exclusion criteria, our laboratory contributed usable data from a total of 253 participants for the SW-RRR, and 224 participants for the MAA-RRR. We used the provided packets after translating the contents into French. In all other respects, we followed the official protocol. Although the protocol required a minimum of 20% men and 20% women, limitations of our subject pool meant that our final sample was only 14% men.

- Included in SW primary analyses
- Included in MAA primary analysis (data-blind approval for collecting sample that was not between 20% and 80% female)
- Included in MAA ancillary analysis of all labs
- Excluded from MAA ancillary analysis with strict inclusion criteria for collecting sample that was not between 20% and 80% female

David D. Loschelder, Leuphana University of Lüneburg  
Mario Mechtel, Leuphana University of Lüneburg  
OSF Page: <https://osf.io/n4jbq/>

A total of 248 students were recruited from the subject pool at Leuphana University of Lüneburg and a psychology and economics lecture from the Major Psychology and the Major Economics program. Participants received course credit for participating. Data collection took place across 3 sessions consisting of 83, 92, and 73 participants. After applying the preregistered exclusion criteria, our laboratory contributed usable data from a total of 226 participants for the SW-RRR, and 212 participants for the MAA-RRR. Participants were tested in either of two lecture halls with 716 seats and 232 seats, respectively. We used the provided packets after translating the contents into German. In all other respects, we followed the official protocol. Although our pre-registered plan specified that we would test all participants in two sessions, less than 100 participants showed up in the first two sessions. We therefore conducted a third session.

- Included in SW primary analyses
- Included in MAA primary analysis
- Included in MAA ancillary analysis of all labs
- Included in MAA ancillary analysis with strict inclusion criteria



Randy McCarthy, Northern Illinois University

John Skowronski, Northern Illinois University

OSF Page: <https://osf.io/9s9ay/>

A total of 318 participants were recruited from undergraduate courses at Northern Illinois University. Data collection took place across 3 sessions consisting of 84, 93, and 141 participants. After applying the preregistered exclusion criteria, our lab contributed 279 participants to the Srull RRR and 218 to the Mazar RRR. Participants were tested in a room with 220 seats.

- Included in SW primary analyses
- Included in MAA primary analysis
- Included in MAA ancillary analysis of all labs
- Included in MAA ancillary analysis with strict inclusion criteria

Ewout H. Meijer, Maastricht University

Katherine Hoogesteyn, Maastricht University

Robin Orthey, Maastricht University & University of Portsmouth

OSF Page: <https://osf.io/j8m7f/>

A total of 377 undergraduate students were recruited at Maastricht University and received either no compensation or course credit for participating. Data collection took place across 6 sessions consisting of 56, 54, 53, 50, 113, and 51 participants. After applying the preregistered exclusion criteria, our laboratory contributed usable data from a total of 336 and 348 for MAA and S&W respectively. All test sessions took place in a room with 400 seats. Due to miscommunication, the preregistration form was filed only after the fourth session. But as lead lab we were involved in developing the protocol and followed it as stated. Our pre-registered plan specified that if after exclusions the number of participants from the first four sessions would fall below 200, we would schedule additional sessions of at least 50 participants until we would have usable data from at least 200 participants. To guarantee sufficient number of participants, we organized two, rather than one additional session as had been specified in our pre-registered plan.

- Included in SW primary analyses
- Included in MAA primary analysis
- Included in MAA ancillary analysis of all labs
- Included in MAA ancillary analysis with strict inclusion criteria

Asil Ali Özdoğru, Üsküdar University

Ezgi Yıldız, Üsküdar University

OSF Page: <https://osf.io/yzp6t/>

A total of 365 students were recruited from psychology courses at Üsküdar University and received course credit for participating. Data collection took place across 5 sessions consisting of 67, 77, 54, 116, and 51 participants. After applying the

preregistered exclusion criteria, our laboratory contributed usable data from a total of 332 participants for the SW-RRR, and 237 participants for the MAA-RRR. Participants were tested in 5 rooms with 100 to 300 seats. We used the provided packets after translating the contents into Turkish. Eight international student participants were tested in English. In all other respects, we followed the official protocol. Although our pre-registered plan specified that we would test at least 70 participants in 3 sessions, because of low attendance rates and the possibility of high exclusion rates and we added two sessions with 116 and 51 participants. Although the protocol required a minimum of 20% men and 80% women, limitations of our subject pool meant that our final sample was only 11% men.

- Included in SW primary analyses
- Included in MAA primary analysis (data-blind approval for collecting sample that was not between 20% and 80% female)
- Included in MAA ancillary analysis of all labs
- Excluded from MAA ancillary analysis with strict inclusion criteria for collecting sample that was not between 20% and 80% female

Charlotte Pennington, University of the West of England

Neil McLatchie, Lancaster University

Lara Warmelink, Lancaster University

OSF Page: <https://osf.io/rkxc3/>

A total number of 255 students were recruited from Lancaster University (LU; n = 124) and University of the West of England (UWE; n = 131). Recruitment was based at two different universities as the Lead Researcher (Charlotte Pennington) moved institutions half way through the project. Data collection took place across 3 sessions consisting of n = 54 (LU), n = 70 (LU), and n = 131 (UWE). After applying the preregistered exclusion criteria, our laboratory contributed usable data from a total of 217 participants for the SW-RRR, and 197 participants for the MAA-RRR.

Participants were tested in lecture theatres with approximately 300 seats. Settings at both LU and UWE were equivalent with regards to room size and layout. We used the provided packets after adapting some aspects from U.S. to U.K. English. In all other respects, we followed the official protocol and there were no other deviations from our pre-registered implementation of it.

- Included in SW primary analyses
- Excluded from MAA primary analysis for not collecting usable data from a minimum of 200 participants
- Included in MAA ancillary analysis of all labs
- Excluded from MAA ancillary analysis with strict inclusion criteria for not collecting usable data from a minimum of 200 participants

Arne Roets, Ghent University

Alain Van Hiel, Ghent University

OSF Page: <https://osf.io/ktp33/>

Arne Roets, Ghent University; Alain Van Hiel, Ghent University

A total of 253 students were recruited from the psychology subject pool at Ghent University and received course credit for participating. Data collection took place in a single session consisting of all 253 participants. After applying the preregistered exclusion criteria, our laboratory contributed usable data from a total of 204 and 192 participants for the Srull RRR and the Mazar RRR, respectively. Participants were tested in a room with 613 seats. We used the provided packets in the Dutch translation. In all other respects, we followed the official protocol. Although the protocol required a minimum of 20% men and 20% women, limitations of our subject pool meant that our final sample was only 11% men. Although our preregistered plan indicated a minimum of 225 participants with valid data, data from a substantial number of the participants had to be excluded because they did not meet the age range criterion. In particular, in addition to the occasional student that was older than 26, forty-one students who participated had yet to reach the age of 18 in the 2 months after the data collection.

- Included in SW primary analyses
- Excluded from MAA primary analysis for not collecting usable data from a minimum of 200 participants
- Included in MAA ancillary analysis of all labs
- Excluded from MAA ancillary analysis with strict inclusion criteria for not collecting usable data from a minimum of 200 participants and for collecting sample that was not between 20% and 80% female

Kristina Suchotzki, University of Würzburg

Matthias Gamer, University of Würzburg

OSF Page: <https://osf.io/ee7qa/>

A total of 256 students were recruited from the psychology subject pool at the University of Würzburg and received course credit for participating. Data collection took place across 3 sessions consisting of 112, 53, and 91 participants. After applying the preregistered exclusion criteria, our laboratory contributed usable data from a total of 240 participants for the replication of the study of Mazar et al. (2008) and a total of 246 participants for the replication of the study of Srull & Wyer (1979). Participants in the first two testing sessions were tested in a room with 405 seats, participants in the last session in a room with approximately 120. We used the provided packets after translating the contents into German. In all other respects, we followed the official protocol. Although our pre-registered plan specified that we would test approximately 85 participants in each session, exact numbers per session differed due to participants'

availability. For the last testing session, our preregistered room was unavailable and we switched to the above mentioned room with approximately 120 seats, with the prior approval of the editor. Although the protocol required a sample with between 20 and 80 % women, limitations of our subject pool meant that our final sample contained 82.5 % women in the Mazar et al. sample and 82.1 % women in the Srull & Weyer sample.

- Included in SW primary analyses
- Included in MAA primary analysis (data-blind approval for collecting sample that was not between 20% and 80% female)
- Included in MAA ancillary analysis of all labs
- Excluded from MAA ancillary analysis with strict inclusion criteria for collecting sample that was not between 20% and 80% female

Angela Sutan, Univ. Bourgogne Franche-Comté, Burgundy School of Business - CEREN

Frank Lentz, Univ. Bourgogne Franche-Comté, Burgundy School of Business - CEREN

Jean-Christian Tisserand, Univ. Bourgogne Franche-Comté, Burgundy School of Business - CEREN

Eli Spiegelman, Univ. Bourgogne Franche-Comté, Burgundy School of Business - CEREN

OSF Page: <https://osf.io/5r6qv/>

A total of 304 students were recruited from the management subject pool at the Burgundy School of Business and received course credit for participating. Data collection took place across 2 parallel sessions consisting of 150 and 154 participants. After applying the preregistered exclusion criteria, our laboratory contributed usable data from a total of 252 participants for the SW-RRR, and 300 participants for the MAA-RRR. Participants were tested in two rooms with 300 seats each. We used the provided packets in English with our English students. In all other respects, we followed the official protocol. After exclusions, 252 participants were eligible for the Srull RRR and 300 were eligible for the Mazar RRR.

- Included in SW primary analyses
- Included in MAA primary analysis
- Included in MAA ancillary analysis of all labs
- Included in MAA ancillary analysis with strict inclusion criteria

Ulrich S. Tran, University of Vienna

Martin Voracek, University of Vienna

OSF Page: <https://osf.io/m4ahg/>

A total of 277 students were recruited from a master-level statistics lecture and a bachelor-level research methods and statistics course at the Faculty of Psychology, University of Vienna. Students volunteered for participation and received no course credit for participation. Data collection took place across two sessions, consisting of 203

and 74 participants. After applying the preregistered exclusion criteria, we contributed usable data from a total of 194 participants for the Srull RRR and 191 for the Mazar RRR. Participants were tested in a room with 396 seats. We used the provided packets with the materials translated into German. In all other respects, we followed the official protocol. Although our pre-registered plan specified that we would test all participants in a single session, a second testing session was conducted to meet the number of required participants.

- Excluded from SW primary analyses for not collecting usable data from a minimum of 200 participants, but included in SW ancillary analyses
- Excluded from MAA primary analysis for not collecting usable data from a minimum of 200 participants
- Included in MAA ancillary analysis of all labs
- Excluded from MAA ancillary analysis with strict inclusion criteria for not collecting usable data from a minimum of 200 participants

Wolf Vanpaemel, University of Leuven

Aline Claesen, University of Leuven

Sara Gomes, University of Leuven

Thomas Verliefde, University of Leuven

OSF Page: <https://osf.io/m9bxw/>

A total of 288 participants (mostly students from the University of Leuven) were recruited and received a movie ticket for participating. Data collection took place across 4 sessions consisting of 116, 69, 32, and 71 participants. After applying the preregistered exclusion criteria, our laboratory contributed usable data from a total of 227 participants for the MAA RRR and 237 participants for the SW1979 RRR.

Participants were tested in rooms with 319, 814, 319 and 245 seats. We used the provided packets, which had been translated into Dutch by another participating lab. In all other respects, we followed the official protocol. Our pre-registered plan specified that we would initially schedule two sessions (in rooms with 319 and 814 seats) but would schedule additional sessions to have usable data of 200 participants. This meant that we had to schedule two additional sessions. The third session took place in the same room as the first session. The fourth session took place in room AV-03.12 (245 seats; picture available on

[https://www.kuleuven.be/lokalen/img/50075063\\_2294E7EB120D1ED4A6C8BCC4BD9F41C0.jpg](https://www.kuleuven.be/lokalen/img/50075063_2294E7EB120D1ED4A6C8BCC4BD9F41C0.jpg)). Because of time pressure when scheduling these additional sessions, we did not ask all participants to register. As a result, we did not cancel the session, even when there were less than 60 registrations, contrary to what is specified in the our pre-registered plan. Some participants seemed to have misunderstood "afstudeerrichting" (major). Instead of their current area of study, they indicated their previous one. Their answers were copied in the data file, preceded with NA.

- Included in SW primary analyses
- Included in MAA primary analysis
- Included in MAA ancillary analysis of all labs
- Included in MAA ancillary analysis with strict inclusion criteria

Bruno Verschuere, University of Amsterdam

Ariane Jim, Ghent University

OSF Page: <https://osf.io/d3z9p/>

A total of 302 students were recruited from the psychology subject pool at University of Amsterdam and received course credit for participating. Data were obtained as part of a bigger test battery (taking about 1.20 hour) that is annually conducted in first year-psychology undergraduates at the University of Amsterdam in 6 sessions, see <http://labs.psychologie.uva.nl/ondersteuning/testzittingen/testzittingen-copy.html>. Data collection took place across 3 sessions consisting of 111, 101, and 90 participants. Participants were tested in a room with 150 seats. We used the provided packets after translating the contents into Dutch. In all other respects, we followed the official protocol. We planned to have participants first complete the RRR booklet, then continue working on the computerized tests of the larger battery (unrelated to the RRR). For session 1, participants first took the computerized tests because of the belated arrival of the RRR booklets. For session 2-3, participants first completed the RRR package, then continued as planned on the computerized tests of the larger battery (unrelated to the RRR). After applying the preregistered exclusion criteria, our laboratory contributed usable data from a total of 285 participants for the SW-RRR, 265 participants for the MAA-RRR.

- Included in SW primary analyses
- Included in MAA primary analysis
- Included in MAA ancillary analysis of all labs
- Included in MAA ancillary analysis with strict inclusion criteria

Katherine Wick, Abilene Christian University

Ryan K. Jessup, Abilene Christian University

Monty L. Lynn, Abilene Christian University

OSF Page: <https://osf.io/f3m32/>

A total of over 367 students were recruited from the economics and businesses classes at Abilene Christian University and received extra course credit for participating. Data collection took place across 5 sessions consisting of 60, 65, 86, 83 and 73 participants. Participants were tested in a room with 125 seats. We used the provided packets with contents written in English. In all other respects, we followed the official protocol. After exclusions, we had 343 participants in the Srull RRR and 334 in the Mazar RRR.

- Included in SW primary analyses
- Included in MAA primary analysis

- Included in MAA ancillary analysis of all labs
- Included in MAA ancillary analysis with strict inclusion criteria

Bradford J. Wiggins, Brigham Young University - Idaho

Scott D. Martin, Brigham Young University - Idaho

Samuel L. Clay, Brigham Young University - Idaho

OSF Page: <https://osf.io/qxfba/>

A total of 259 students were recruited from the psychology subject pool at Brigham Young University - Idaho and received course credit for participating. Data collection took place across 3 sessions consisting of 86, 55, and 118 participants. After applying the preregistered exclusion criteria, our laboratory contributed usable data from a total of 244 participants for the Srull RRR and 240 for the Mazar RRR. Participants were tested in a room with 240 seats. We used the provided packets. In all respects, we followed the official protocol.

- Included in SW primary analyses
- Included in MAA primary analysis
- Included in MAA ancillary analysis of all labs
- Included in MAA ancillary analysis with strict inclusion criteria
